# Supplementary material for: Nonstop mRNAs generate a ground state of mitochondrial gene expression noise
Source: PubMed Central journal article supplement (PMC9674279; doi:10.1126/sciadv.abq5234), 2022-11-18
Supplement: sciadv.abq5234_sm.pdf [file sciadv.abq5234_sm.pdf]

Supplementary Materials for  
**Nonstop mRNAs generate a ground state of mitochondrial gene  
expression noise**

Kah Ying Ng *et al.*

Corresponding author: Brendan J. Battersby, [brendan.battersby@helsinki.fi](mailto:brendan.battersby@helsinki.fi)

*Sci. Adv.* **8**, eabq5234 (2022)  
DOI: 10.1126/sciadv.abq5234

**This PDF file includes:**

Figs. S1 to S7  
Table S1

**A**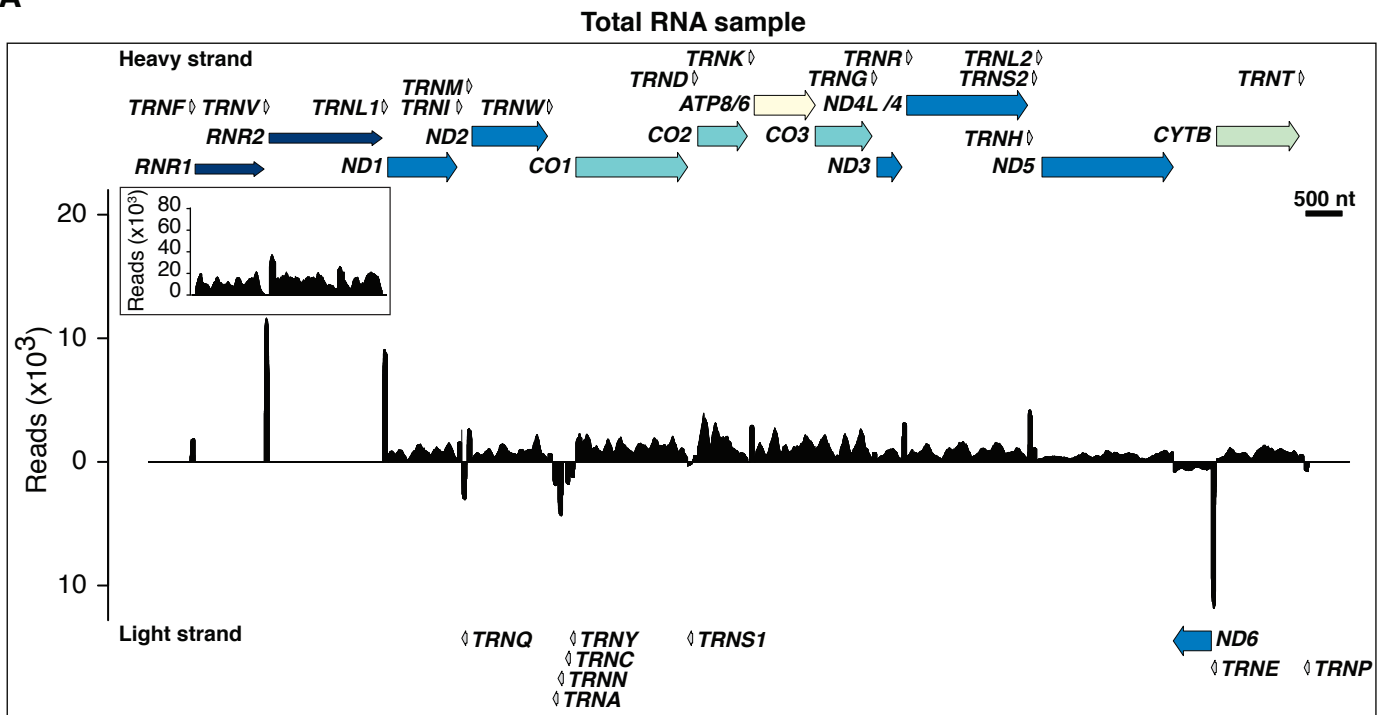**B**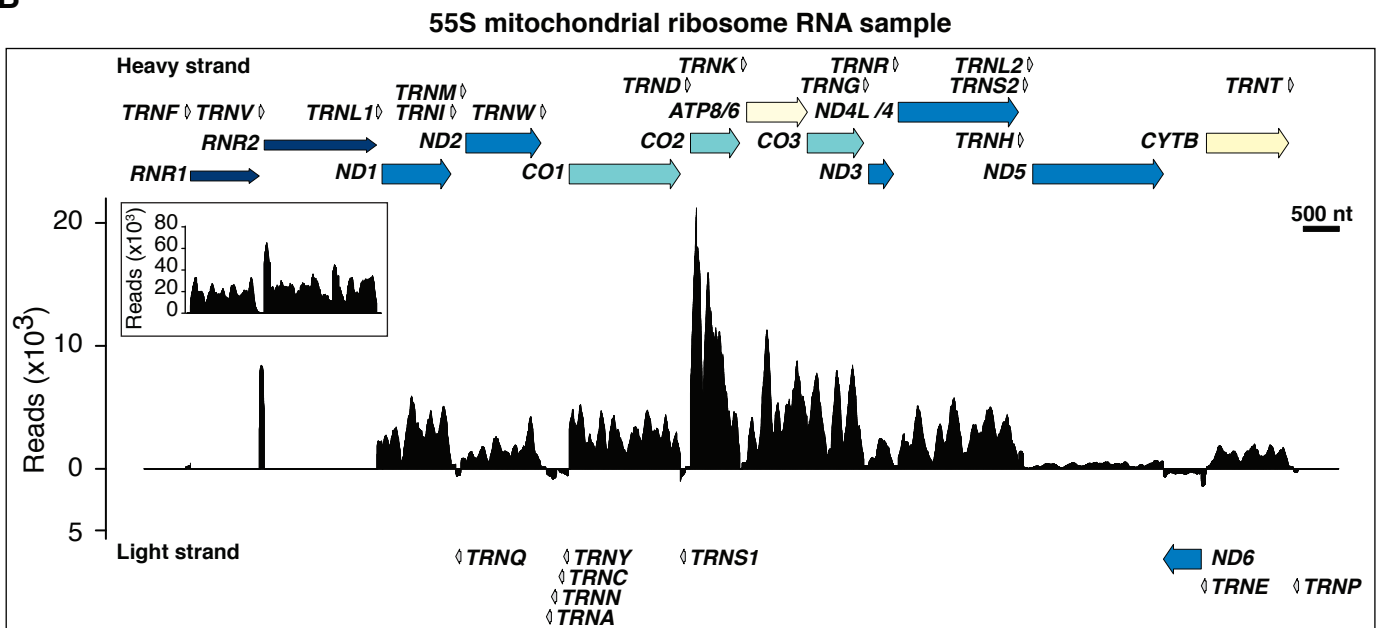**C**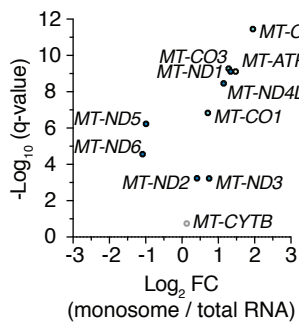**D**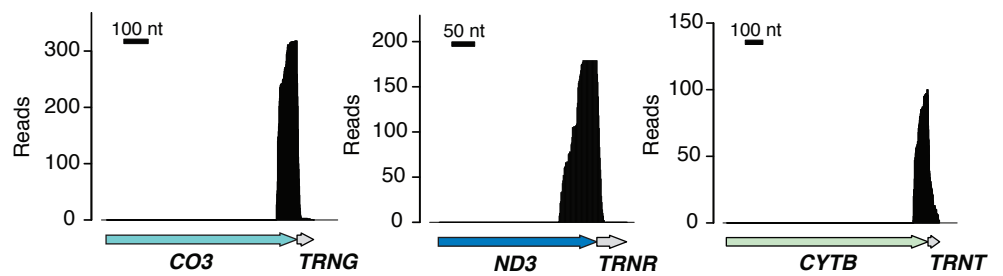

**Fig. S1: Deep sequencing analysis of mitochondrial RNA using the group II intron reverse transcriptase (TGIRT) provides robust unbiased coverage of the transcriptome and reveals aberrant tRNA processing.** (A), Mapped sequencing reads from RNA isolated from the whole cell RNA prepared from the HEK293 cell line. Inset box, mapping of rRNA. (B), Mapped sequencing reads from RNA isolated from mitochondrial ribosomes. In the human mitochondrial ribosome, the tRNA<sup>Val</sup> has been incorporated as a structural component and thus notably enriched in these preparations. (C) As a measure of translation efficiency, the fold change (FC) in mRNA abundance sequenced from the mitochondrial ribosome was normalized to the total mRNA abundance. (D), Examples of deep sequencing reads of mRNA (*MT-CO3*, *ND3* and *CYTB*) with the mapped 3' end containing flanking tRNA sequence. RNA isolated from mitochondrial ribosomes following sucrose density gradient separation.

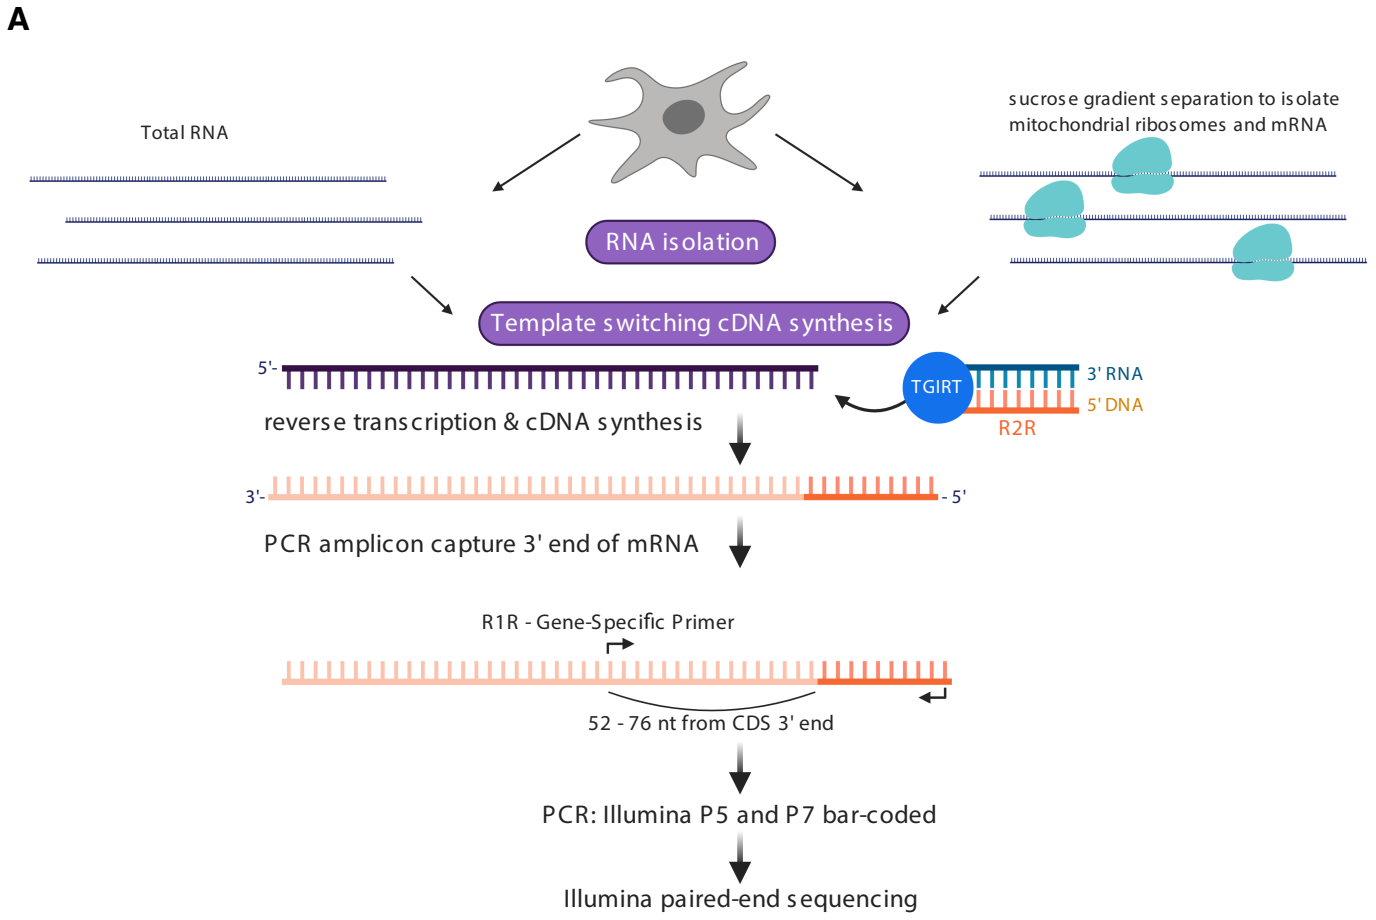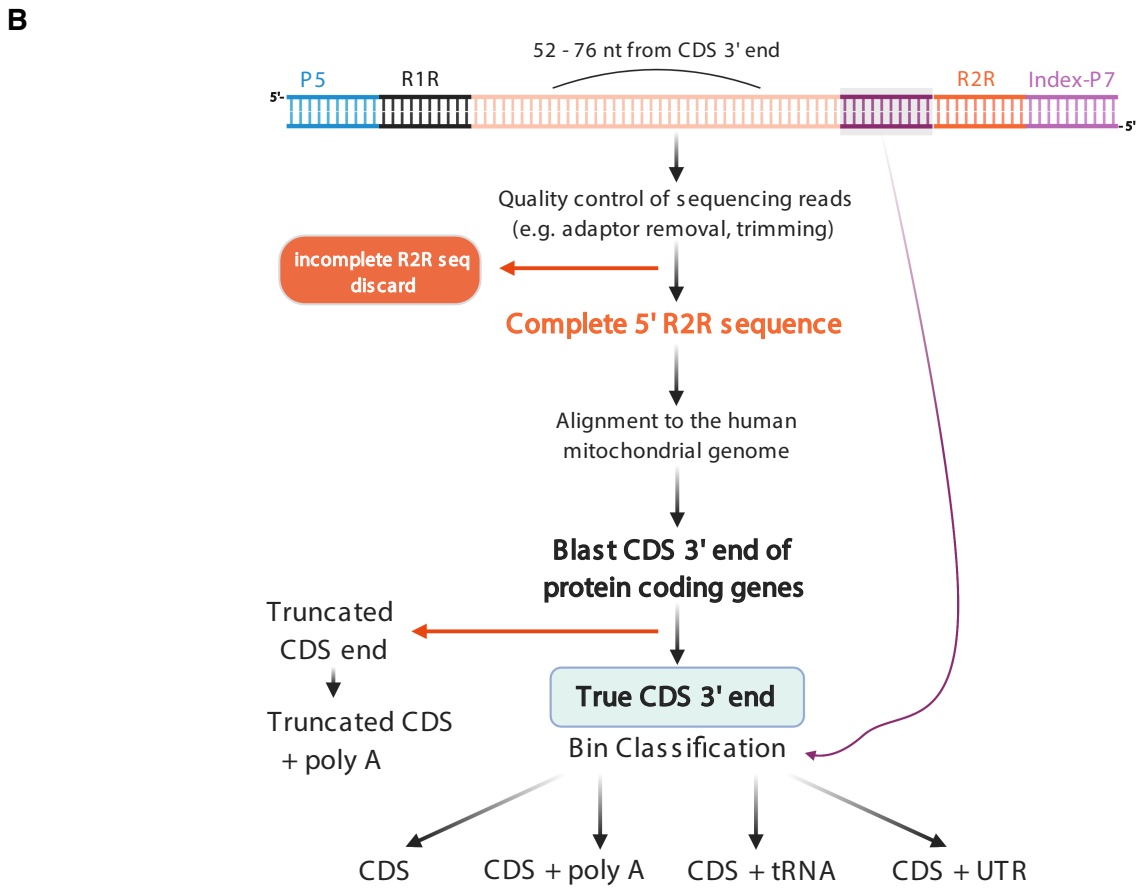



**Fig. S2: Deep sequencing approach to analyze specifically the 3' end of mitochondrial mRNA using the group II intron reverse transcriptase (TGIRT).** (A) Schematic of the RNA sample isolation, cDNA synthesis, and library preparation for deep sequencing. (B) Workflow of the bioinformatic pipeline to analyze Illumina sequencing reads. Images created with BioRender.com.

**A**

**PRORP/MRPP3**

30 a.a.

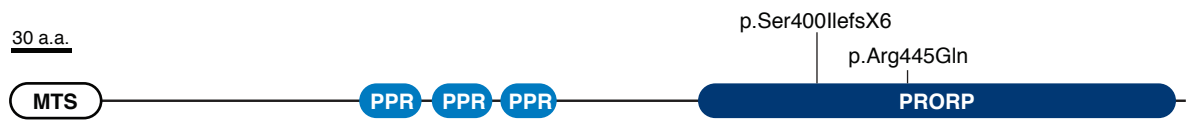

**B**

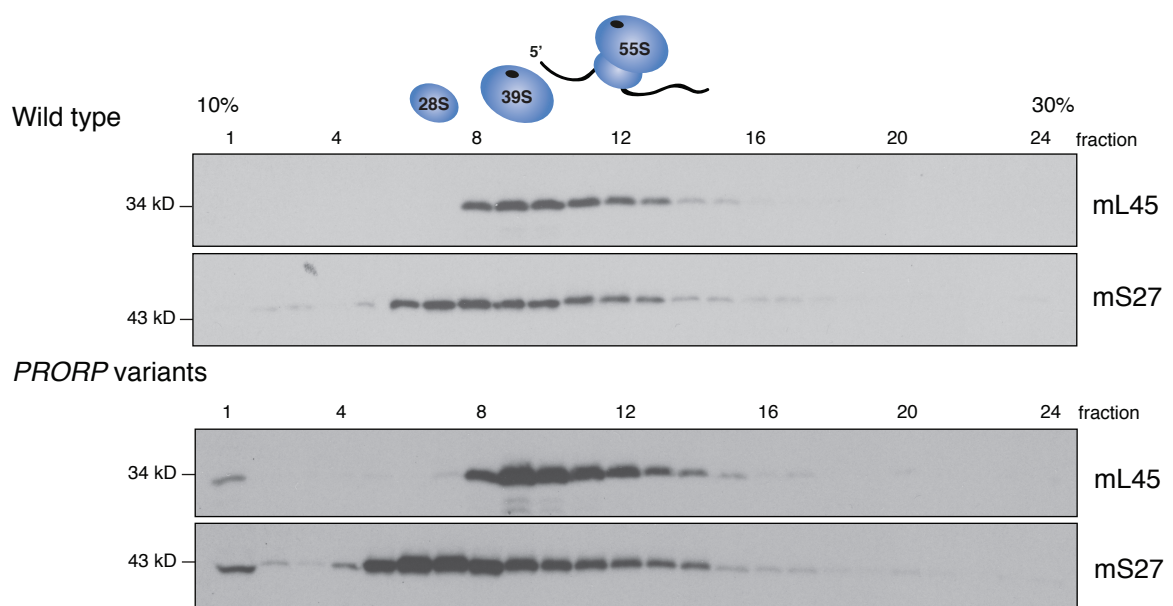

**Fig. S3: Pathogenic variants in *PRORP* disrupt mitochondrial RNA processing but do not impair the assembly of mitochondrial ribosomes.** (A) Schematic of the protein domains for PRORP and the location of pathogenic variants. MTS, mitochondrial targeting sequence. PPR, pentatricopeptide repeat. PRORP, protein-only RNase P. (B) Sucrose density gradient separation of mitochondrial ribosomes from cultured human fibroblasts with the indicated genotypes.

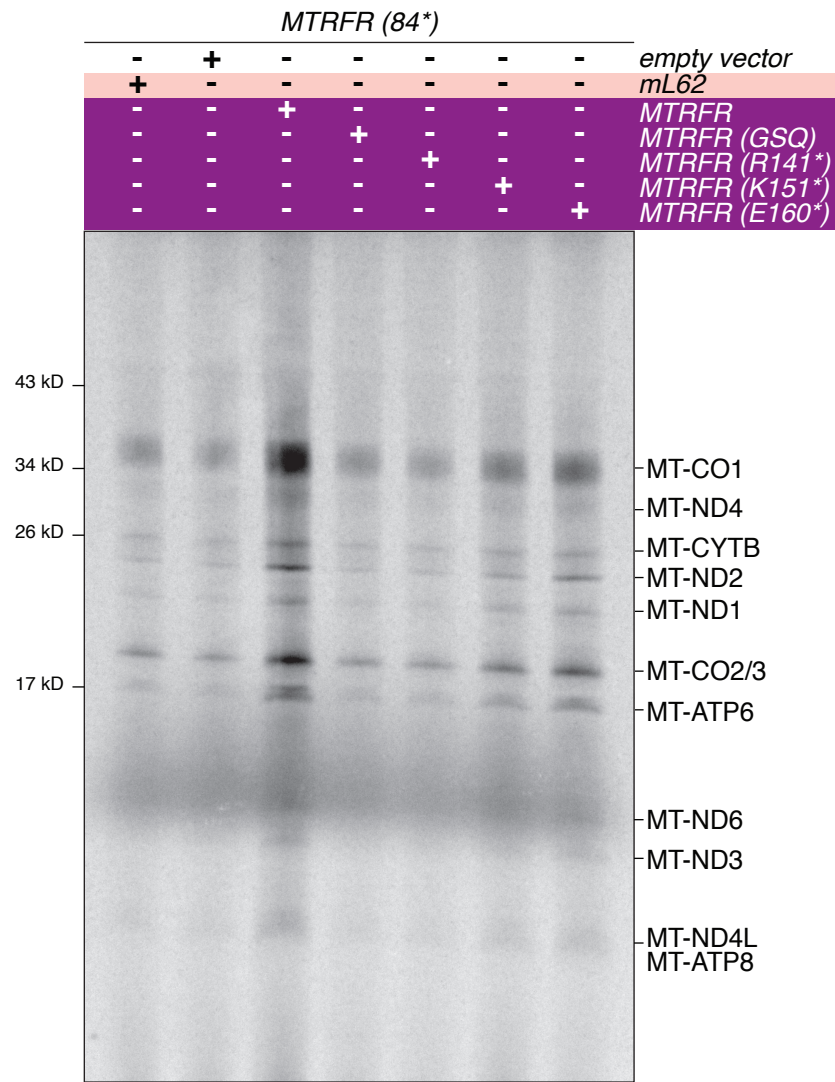

coomassie stained gel

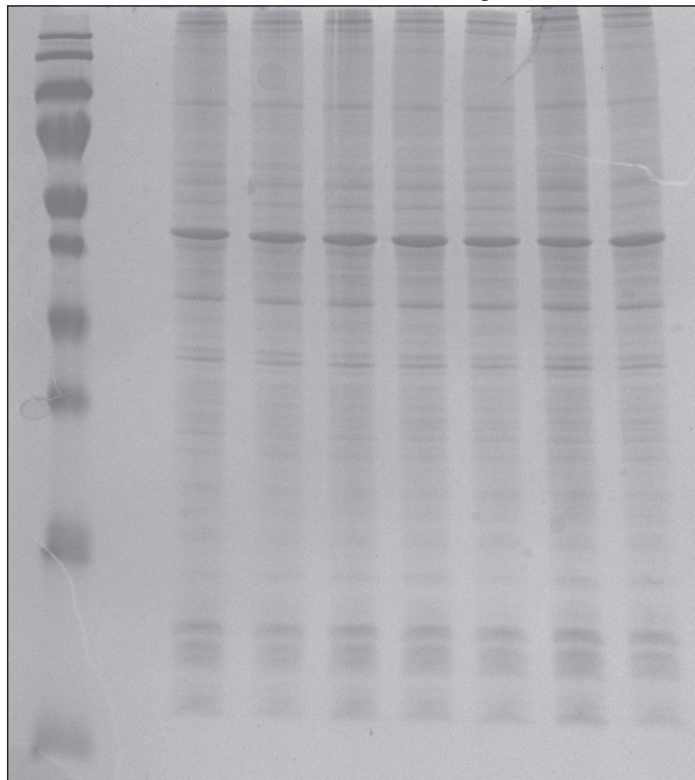

**Fig. S4: Impaired mitochondrial protein synthesis with MTRFR deficiency.** A representative <sup>35</sup>S- metabolic pulse labelling experiment in MTRFR-deficient (84\*) fibroblasts stably transduced with cDNAs of the indicated MTRFR alleles and wild type *mL62*. Following exposure to a phosphoimaging screen the gel was hydrated and stained with coomassie to verify equal loading.

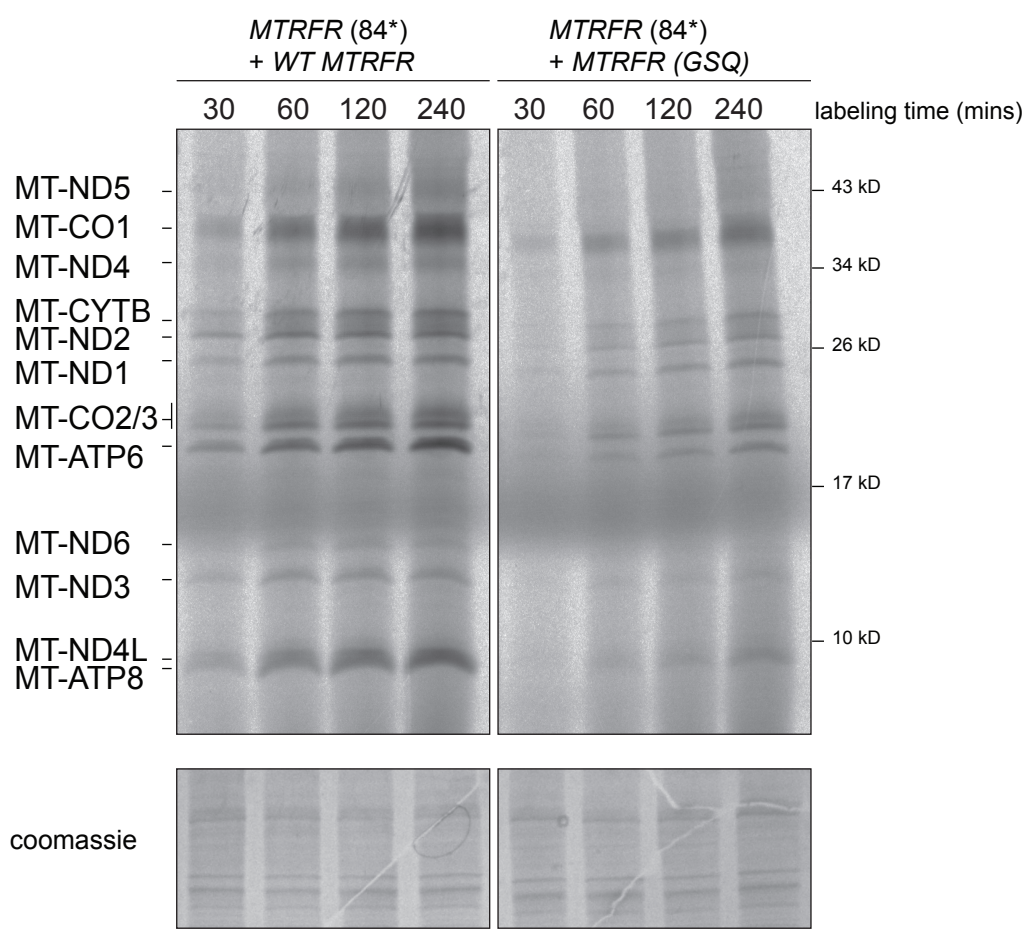

**Fig. S5: Impaired mitochondrial protein synthesis with MTRFR deficiency.** A representative <sup>35</sup>S- metabolic extended pulse labeling experiment in MTRFR-deficient (84\*) fibroblasts stably transduced with cDNAs of the indicated MTRFR alleles. Prior to labeling, cells were first treated with puromycin to terminate protein synthesis followed by a quick wash in PBS then a 24-hour incubation with chloramphenicol to inhibit mitochondrial translation elongation. Cells were washed in PBS followed by incubation with fresh labeling media (minus methionine and cysteine) in the presence of anisomycin for 5 minutes prior to adding <sup>35</sup>S-methionine/cysteine. Cell lysates were then separated by SDS-PAGE, dried, and exposed to a phosphoimaging screen. Subsequently, the gel was hydrated and stained with coomassie to verify equal loading. Data is representative of three independent experiments.

wild type myoblasts

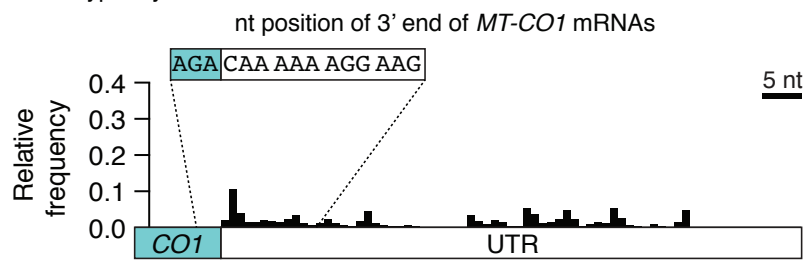

wild type skeletal muscle

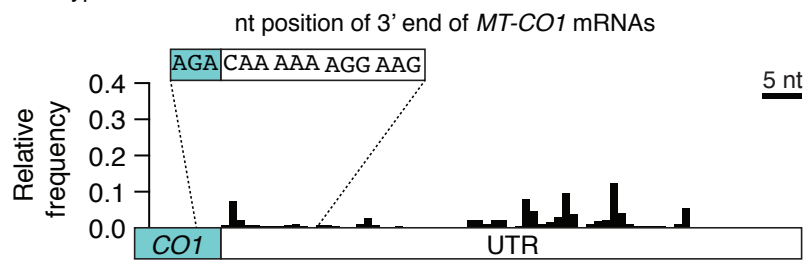



**Fig. S6: Mapping the 3' nucleotide for *MT-CO1* mRNAs.** Frequency histograms indicating the mapped 3' nucleotide position from deep sequencing of *MT-CO1* mRNAs that were not polyadenylated and isolated from the whole transcriptome of healthy wild type myoblasts and skeletal muscle. Data analysis taken from 47 818 sequencing reads for myoblasts and 176 107 for skeletal muscle.

wild type fibroblasts

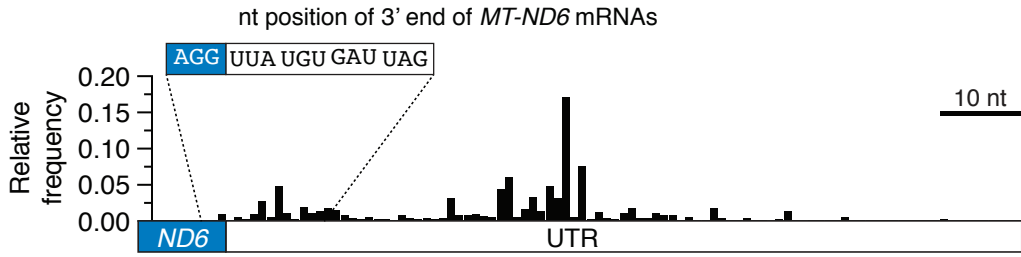

wild type myoblasts

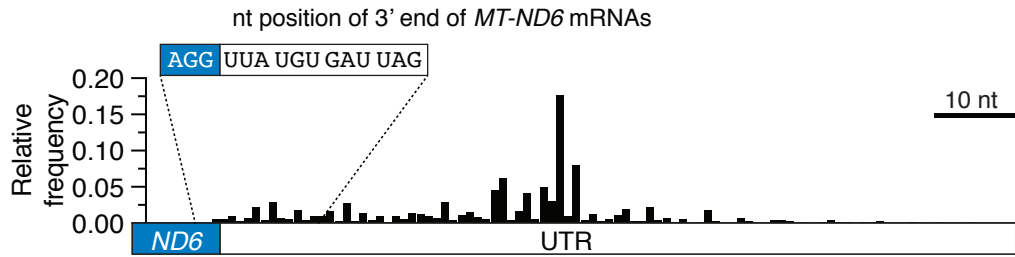

wild type skeletal muscle

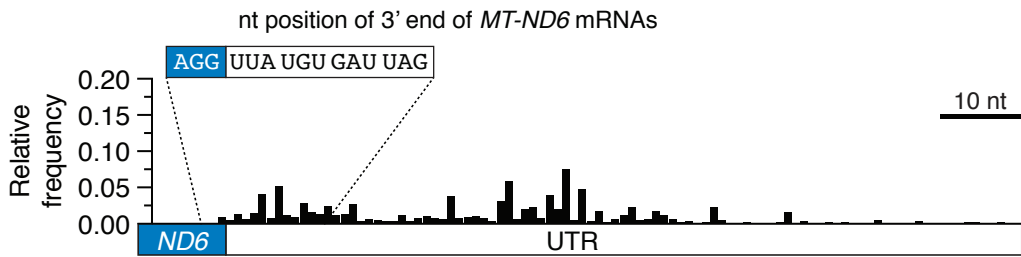

*MTRFR* (84\*) fibroblasts

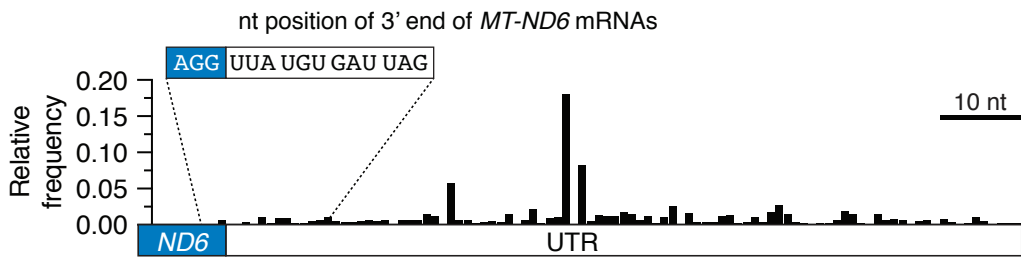

- translation; wild type fibroblasts

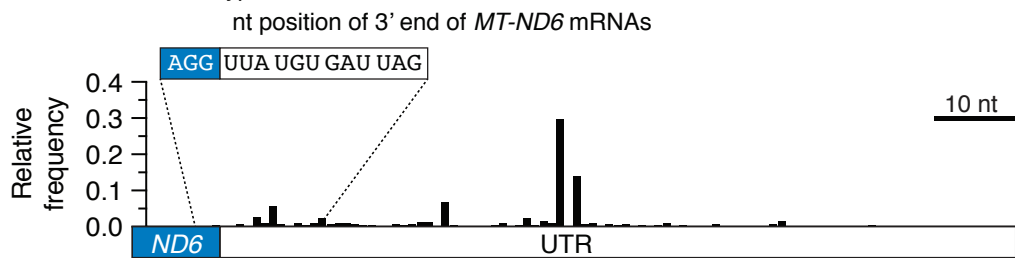

**Fig. S7: Mapping the 3' nucleotide for *MT-ND6* mRNAs.** Frequency histograms indicating the mapped 3' nucleotide position from deep sequencing of *MT-ND6* mRNAs that were not polyadenylated and isolated from the whole transcriptome of healthy wild type fibroblasts, myoblasts, skeletal muscle, MTRFR deficiency, and chloramphenicol inhibition of mitochondrial translation. Data analysis taken from 59 638 sequencing reads for fibroblasts, 14 594 for myoblasts, 12 729 for skeletal muscle, 189 861 for MTRFR deficiency, and 7216 for translation inhibition.

Table S1: The encoded 3' end of the CDS from mitochondrial mRNAs across primates and the house mouse.

| Order    | Genus species                    | ND1 | ND2 | CO1 | CO2 | ATP8 | ATP6 | CO3 | ND3 | ND4L | ND4 | ND5 | CYTB | ND6 |
|----------|----------------------------------|-----|-----|-----|-----|------|------|-----|-----|------|-----|-----|------|-----|
| Primates | <i>Homo sapiens</i>              | UA  | U   | AGA | UAG | UAG  | UAA  | U   | U   | UAA  | U   | UAA | U    | AGG |
|          | <i>Pan troglodytes</i>           | UA  | U   | AGA | UAG | UAG  | UAA  | U   | U   | UAA  | U   | UAA | U    | AGG |
|          | <i>Macaca mulatta</i>            | UA  | U   | UAA | UAA | UAA  | UAA  | U   | U   | UAA  | U   | UAA | U    | AGG |
|          | <i>Callithrix pygmaea</i>        | UA  | U   | AGG | U   | UAA  | UAA  | U   | U   | UAA  | U   | UAA | UAA  | UAA |
|          | <i>Tarsius dentatus</i>          | UAA | U   | UAG | UAA | UAA  | UAA  | U   | UA  | UAA  | U   | UAA | UAA  | UAA |
|          | <i>Microcebus berthae</i>        | UA  | UAG | AGA | UAA | UAG  | UAA  | U   | UAA | UAA  | U   | UAA | AGA  | UAA |
| Rodentia | <i>Mus musculus</i><br>(C57BL/6) | U   | U   | UAA | UAA | UAA  | UAA  | U   | UAA | UAA  | U   | UAA | U    | UAA |

The reference mitochondrial genome sequences: NC\_012920; NC\_001643.1; NC\_005943.1; NC\_021942.1; NC\_024052.1; NC\_035629.1; NC\_005089.1.
